# Supplementary material for: Controlled synthesis of mixed-valent Fe-containing metal organic frameworks for the degradation of phenol under mild conditions
Source: Royal Society of Chemistry journal article supplement (doi:10.1039/c5dt05002b), 2016-01-01
Supplement: c5dt05002b1.pdf [file c5dt05002b1.pdf]

## *Supporting Information*

# **Controlled Synthesis of Mixed-Valent Fe-Containing Metal Organic Framework for Degradation of Phenol under Mild Conditions**

Qiao Sun<sup>a</sup>, Min Liu<sup>a</sup>, Keyan Li<sup>a</sup>, Yitong Han<sup>a</sup>, Yi Zuo<sup>a</sup>, Junhu Wang<sup>b</sup>, Chunshan

Song<sup>\*,a,c</sup>, Guoliang Zhang<sup>d</sup>, and Xinwen Guo<sup>\*,a</sup>

<sup>a</sup>State Key Laboratory of Fine Chemicals, PSU-DUT Joint Center for Energy  
Research, School of Chemical Engineering, Dalian University of Technology, Dalian  
116024, People's Republic of China

<sup>b</sup>Mössbauer Effect Data Center, Dalian Institute of Chemical Physics, Chinese  
Academy of Sciences, Dalian, People's Republic of China

<sup>c</sup>EMS Energy Institute, PSU-DUT Joint Center for Energy Research and Department  
of Energy & Mineral Engineering, Pennsylvania State University, University Park,  
Pennsylvania 16802, United States

<sup>d</sup>College of Biological and Environmental Engineering, Zhejiang University of  
Technology, Hangzhou 310014, People's Republic of China

\*X. Guo. E-mail: guoxw@dlut.edu.cn; Fax: +86-0411-84986134; Tel: +86-0411-

84986133

\*C. Song. E-mail: csong@psu.edu; Fax: +1-814-863-4466; Tel: +1-814-865-3573

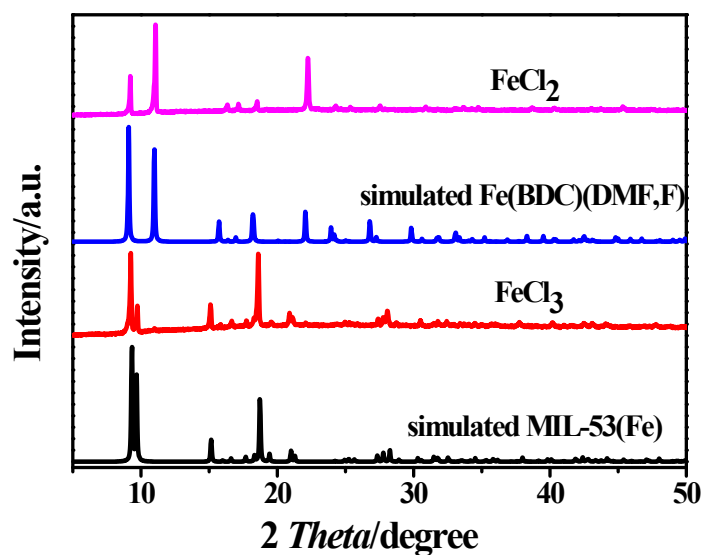

Fig. S1 XRD patterns of simulated Fe(BDC)(DMF,F) and MIL-53(Fe), and samples synthesized with FeCl<sub>3</sub> and FeCl<sub>2</sub>

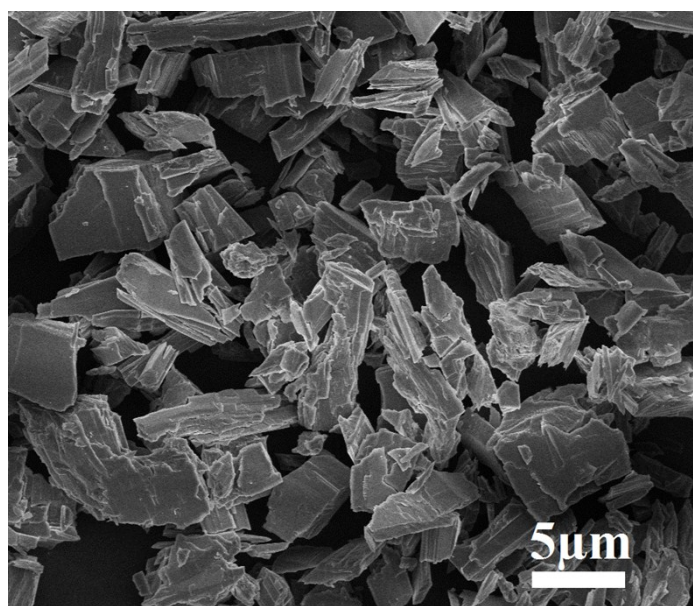

Fig. S2 SEM image of the sample prepared with FeCl<sub>3</sub>

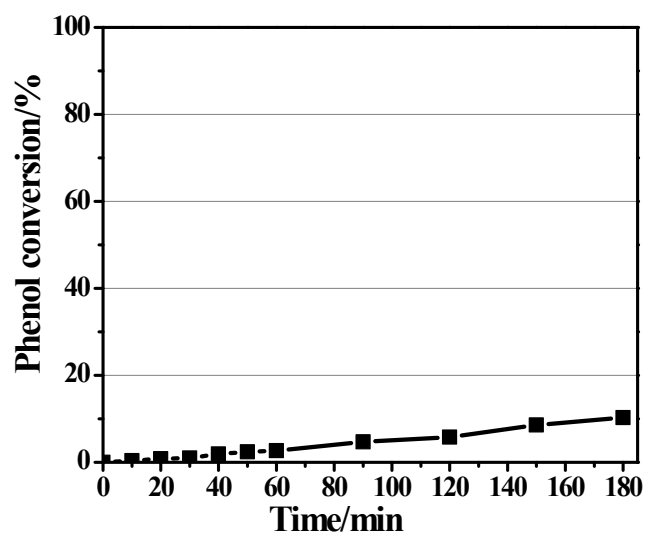

Fig. S3 Time conversion plot of phenol degradation over the nano Fe<sub>3</sub>O<sub>4</sub> (Conditions: initial phenol concentration, 1000 mg L<sup>-1</sup>;  $n(\text{H}_2\text{O}_2):n(\text{phenol})=14$ ; initial pH 6.2; cat 0.064 g L<sup>-1</sup>; 35 °C, 1 atm, 3 h)

Table S1 Results of the leached iron in the solution after degradation

| sample                | Fe/mg L <sup>-1</sup> |
|-----------------------|-----------------------|
| <b>FeMOF-71</b>       | 1.3                   |
| <b>FeMOF-31</b>       | 1.0                   |
| <b>FeMOF-11</b>       | 1.2                   |
| <b>FeMOF-13</b>       | 1.4                   |
| <b>FeMOF-17</b>       | 1.0                   |
| <b>Fe(BDC)(DMF,F)</b> | 1.2                   |

Conditions: initial phenol concentration, 1000 mg L<sup>-1</sup>;  $n(\text{H}_2\text{O}_2):n(\text{phenol})=14$ ; initial pH 6.2; cat 0.32 g L<sup>-1</sup>; 35 °C, 1 atm, 3 h.

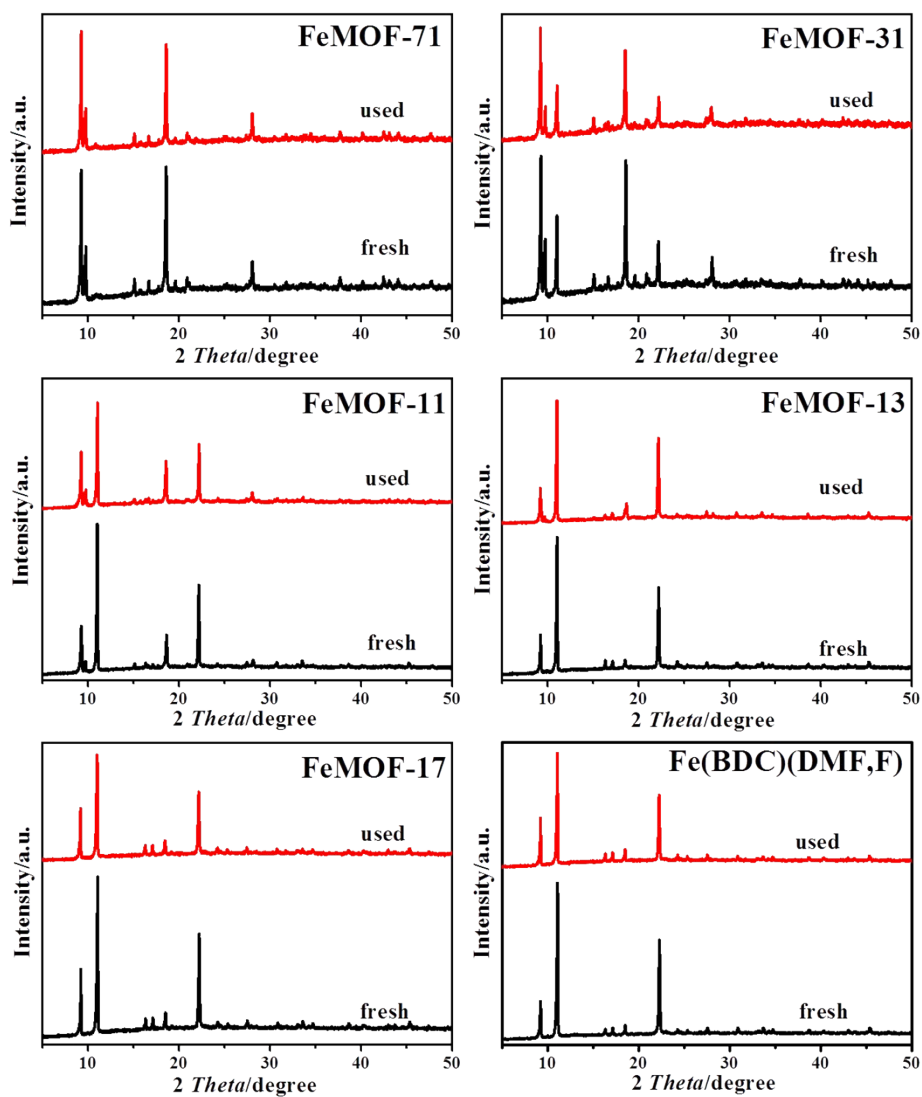

Fig. S4 XRD patterns of the fresh and used iron-containing MOFs

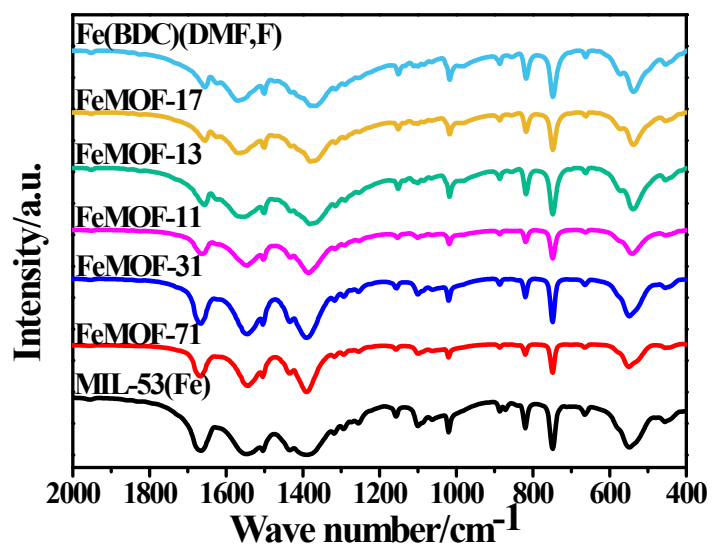

Fig. S5 FT-IR spectra of the samples synthesized with different  $n(\text{FeCl}_3)/n(\text{FeCl}_2)$
